# Supplementary material for: Survey Results of Honey Bee Colony Losses in Winter in China (2009–2021)
Source: MDPI journal article supplement (doi:10.3390/insects14060554), 2023-06-14
Supplement: s1 [file s1]

**Table S2.** Summary results of GLMM models fitting .

| <b>Models with Fixed Effects</b>                     | <b>AIC</b>  | <b>BIC</b>  |
|------------------------------------------------------|-------------|-------------|
| Size, species, migration, qp                         | 31224.85422 | 31283.29033 |
| Size, species, vt, migration, qp                     | 31225.65337 | 31290.58237 |
| Size, species, Requeening, migration, qp             | 31226.16104 | 31291.09005 |
| Size, species, migration, qp, wf                     | 31226.65206 | 31291.58106 |
| Size, vt, migration, qp                              | 31233.9127  | 31292.34881 |
| Size, species, oq, migration, qp                     | 31222.98461 | 31294.40651 |
| Size, species, Requeening, vt, migration, qp         | 31226.84923 | 31298.27113 |
| Size, species, vt, migration, qp, wf                 | 31227.50892 | 31298.93083 |
| Size, species, Requeening, migration, qp, wf         | 31227.79271 | 31299.21462 |
| Size, Requeening, vt, migration, qp                  | 31235.55357 | 31300.48257 |
| Size, vt, migration, qp, wf                          | 31235.78314 | 31300.71214 |
| Size, oq, vt, migration, qp                          | 31229.93517 | 31301.35707 |
| Size, species, oq, vt, migration, qp                 | 31223.57926 | 31301.49407 |
| Size, species, oq, migration, qp, wf                 | 31223.94583 | 31301.86063 |
| Size, species, Requeening, oq, migration, qp         | 31224.77612 | 31302.69093 |
| Size, species, Requeening, vt, migration, qp, wf     | 31228.55252 | 31306.46732 |
| Size, Requeening, vt, migration, qp, wf              | 31237.33199 | 31308.7539  |
| Size, oq, vt, migration, qp, wf                      | 31230.97519 | 31308.88999 |
| Size, species, oq, vt, migration, qp, wf             | 31224.65559 | 31309.0633  |
| Size, species, Requeening, oq, vt, migration, qp     | 31225.33461 | 31309.74232 |
| Size, Requeening, oq, vt, migration, qp              | 31231.86378 | 31309.77858 |
| Size, species, Requeening, oq, migration, qp, wf     | 31225.59293 | 31310.00064 |
| Size, species, Requeening, oq, vt, migration, qp, wf | 31226.26706 | 31317.16767 |
| Size, Requeening, oq, vt, migration, qp, wf          | 31232.81807 | 31317.22578 |
| Size, oq, migration, qp                              | 31268.65983 | 31333.58883 |
| species, migration, qp                               | 31292.81412 | 31338.26443 |
| Size, oq, migration, qp, wf                          | 31268.07965 | 31339.50156 |
| Size, migration, qp                                  | 31287.90337 | 31339.84657 |
| Size, Requeening, oq, migration, qp                  | 31269.98353 | 31341.40543 |
| species, vt, migration, qp                           | 31293.3228  | 31345.266   |
| species, migration, qp, wf                           | 31294.35333 | 31346.29653 |
| Size, Requeening, migration, qp                      | 31288.1234  | 31346.55951 |
| species, Requeening, migration, qp                   | 31294.75713 | 31346.70034 |
| Size, migration, qp, wf                              | 31288.42935 | 31346.86545 |
| Size, species, qp                                    | 31295.14026 | 31347.08346 |
| vt, migration, qp                                    | 31301.85957 | 31347.30987 |
| Size, Requeening, oq, migration, qp, wf              | 31269.72175 | 31347.63656 |
| species, oq, migration, qp                           | 31290.85994 | 31349.29604 |
| species, vt, migration, qp, wf                       | 31294.96121 | 31353.39731 |
| species, Requeening, vt, migration, qp               | 31295.22617 | 31353.66227 |

|                                                |             |             |
|------------------------------------------------|-------------|-------------|
| Size, Requeening, migration, qp, wf            | 31289.17963 | 31354.10863 |
| Size, species, vt, qp                          | 31295.79738 | 31354.23348 |
| species, Requeening, migration, qp, wf         | 31296.21855 | 31354.65465 |
| Size, species, qp, wf                          | 31296.67053 | 31355.10663 |
| Size, species, Requeening, qp                  | 31296.9774  | 31355.4135  |
| vt, migration, qp, wf                          | 31303.52313 | 31355.46633 |
| Requeening, vt, migration, qp                  | 31303.86261 | 31355.80581 |
| oq, vt, migration, qp                          | 31297.47652 | 31355.91262 |
| species, oq, vt, migration, qp                 | 31291.28355 | 31356.21255 |
| species, oq, migration, qp, wf                 | 31291.4422  | 31356.3712  |
| Size, species, oq, qp                          | 31292.54584 | 31357.47484 |
| species, Requeening, oq, migration, qp         | 31292.86234 | 31357.79135 |
| species, Requeening, vt, migration, qp, wf     | 31296.7819  | 31361.71091 |
| Size, species, vt, qp, wf                      | 31297.42305 | 31362.35205 |
| Size, species, Requeening, vt, qp              | 31297.57541 | 31362.50441 |
| oq, vt, migration, qp, wf                      | 31298.16993 | 31363.09894 |
| Size, species, Requeening, qp, wf              | 31298.38484 | 31363.31385 |
| species, oq, vt, migration, qp, wf             | 31292.01005 | 31363.43196 |
| Requeening, vt, migration, qp, wf              | 31305.51468 | 31363.95079 |
| Requeening, oq, vt, migration, qp              | 31299.43479 | 31364.3638  |
| Size, species, oq, qp, wf                      | 31292.99221 | 31364.41412 |
| Size, species, oq, vt, qp                      | 31293.07437 | 31364.49628 |
| species, Requeening, oq, vt, migration, qp     | 31293.28618 | 31364.70809 |
| species, Requeening, oq, migration, qp, wf     | 31293.42787 | 31364.84977 |
| Size, vt, qp                                   | 31313.37762 | 31365.32082 |
| Size, species, Requeening, oq, qp              | 31294.53632 | 31365.95823 |
| Size, species, Requeening, vt, qp, wf          | 31299.07779 | 31370.4997  |
| Size, species, oq, vt, qp, wf                  | 31293.66527 | 31371.58008 |
| Requeening, oq, vt, migration, qp, wf          | 31300.16891 | 31371.59082 |
| species, Requeening, oq, vt, migration, qp, wf | 31293.98681 | 31371.90162 |
| Size, oq, vt, qp                               | 31307.0801  | 31372.00911 |
| Size, species, Requeening, oq, qp, wf          | 31294.92324 | 31372.83805 |
| Size, species, Requeening, oq, vt, qp          | 31295.05575 | 31372.97056 |
| Size, vt, qp, wf                               | 31315.01716 | 31373.45327 |
| Size, Requeening, vt, qp                       | 31315.37682 | 31373.81292 |
| Size, oq, vt, qp, wf                           | 31307.57653 | 31378.99844 |
| Size, species, Requeening, oq, vt, qp, wf      | 31295.57981 | 31379.98752 |
| Size, Requeening, oq, vt, qp                   | 31309.03969 | 31380.4616  |
| Size, Requeening, vt, qp, wf                   | 31316.99856 | 31381.92756 |
| Size, Requeening, oq, vt, qp, wf               | 31309.57487 | 31387.48968 |
| oq, migration, qp                              | 31337.31471 | 31389.25792 |
| oq, migration, qp, wf                          | 31336.17283 | 31394.60894 |
| Requeening, oq, migration, qp                  | 31337.56735 | 31396.00345 |

|                                     |             |             |
|-------------------------------------|-------------|-------------|
| migration, qp                       | 31361.04833 | 31400.00574 |
| Requeening, oq, migration, qp, wf   | 31337.0056  | 31401.9346  |
| Requeening, migration, qp           | 31358.8694  | 31404.31971 |
| migration, qp, wf                   | 31360.87059 | 31406.3209  |
| Requeening, migration, qp, wf       | 31359.66976 | 31411.61296 |
| species, qp                         | 31389.96974 | 31428.92714 |
| Size, oq, qp                        | 31373.7977  | 31432.2338  |
| species, vt, qp                     | 31390.24963 | 31435.69993 |
| Size, oq, qp, wf                    | 31371.36991 | 31436.29891 |
| species, qp, wf                     | 31390.99021 | 31436.44052 |
| species, Requeening, qp             | 31391.74104 | 31437.19134 |
| Size, Requeening, oq, qp            | 31372.86109 | 31437.7901  |
| species, oq, qp                     | 31386.6221  | 31438.5653  |
| Size, Requeening, oq, qp, wf        | 31371.35221 | 31442.77412 |
| species, vt, qp, wf                 | 31391.4278  | 31443.371   |
| species, Requeening, vt, qp         | 31392.0885  | 31444.0317  |
| species, Requeening, qp, wf         | 31392.8986  | 31444.8418  |
| species, oq, qp, wf                 | 31386.54037 | 31444.97648 |
| species, oq, vt, qp                 | 31386.98695 | 31445.42305 |
| species, Requeening, oq, qp         | 31388.27469 | 31446.71079 |
| vt, qp                              | 31411.06527 | 31450.02267 |
| species, Requeening, vt, qp, wf     | 31393.36948 | 31451.80558 |
| species, oq, vt, qp, wf             | 31387.08318 | 31452.01218 |
| species, Requeening, oq, qp, wf     | 31388.37821 | 31453.30721 |
| species, Requeening, oq, vt, qp     | 31388.68598 | 31453.61498 |
| oq, vt, qp                          | 31402.89024 | 31454.83345 |
| Requeening, vt, qp                  | 31412.23724 | 31457.68754 |
| vt, qp, wf                          | 31412.26114 | 31457.71144 |
| Size, qp                            | 31412.52265 | 31457.97295 |
| Size, Requeening, qp                | 31406.94295 | 31458.88615 |
| species, Requeening, oq, vt, qp, wf | 31388.94519 | 31460.3671  |
| oq, vt, qp, wf                      | 31402.88716 | 31461.32326 |
| Requeening, oq, vt, qp              | 31404.0406  | 31462.4767  |
| Size, qp, wf                        | 31411.05394 | 31462.99714 |
| Size, Requeening, qp, wf            | 31407.16286 | 31465.59897 |
| Requeening, vt, qp, wf              | 31413.67719 | 31465.6204  |
| Requeening, oq, vt, qp, wf          | 31404.33301 | 31469.26201 |
| oq, qp                              | 31478.17533 | 31523.62563 |
| Requeening, oq, qp                  | 31473.56659 | 31525.50979 |
| oq, qp, wf                          | 31474.69896 | 31526.64216 |
| Requeening, oq, qp, wf              | 31471.62695 | 31530.06305 |
| Requeening, qp                      | 31517.38659 | 31556.34399 |
| Requeening, qp, wf                  | 31517.10013 | 31562.55043 |

|                                                  |             |             |
|--------------------------------------------------|-------------|-------------|
| qp                                               | 31532.26732 | 31564.73183 |
| qp, wf                                           | 31528.87457 | 31567.83197 |
| Size, species, migration                         | 31517.84806 | 31569.79126 |
| Size, species, vt, migration                     | 31518.27017 | 31576.70628 |
| Size, species, migration, wf                     | 31518.91861 | 31577.35471 |
| Size, species, Requeening, migration             | 31519.58635 | 31578.02245 |
| Size, vt, migration                              | 31528.09189 | 31580.03509 |
| Size, species, oq, migration                     | 31519.05219 | 31583.9812  |
| Size, species, vt, migration, wf                 | 31519.48763 | 31584.41663 |
| Size, species, Requeening, vt, migration         | 31519.93042 | 31584.85943 |
| Size, species, Requeening, migration, wf         | 31520.43715 | 31585.36615 |
| Size, vt, migration, wf                          | 31529.34657 | 31587.78268 |
| Size, Requeening, vt, migration                  | 31530.02354 | 31588.45965 |
| Size, species, oq, migration, wf                 | 31519.39561 | 31590.81751 |
| Size, species, oq, vt, migration                 | 31519.48251 | 31590.90442 |
| Size, oq, vt, migration                          | 31527.20772 | 31592.13672 |
| Size, species, Requeening, oq, migration         | 31520.86899 | 31592.29089 |
| Size, species, Requeening, vt, migration, wf     | 31520.92682 | 31592.34872 |
| Size, Requeening, vt, migration, wf              | 31531.1723  | 31596.10131 |
| Size, species, oq, vt, migration, wf             | 31519.98118 | 31597.89599 |
| Size, species, Requeening, oq, migration, wf     | 31521.0356  | 31598.95041 |
| Size, oq, vt, migration, wf                      | 31527.65858 | 31599.08048 |
| Size, species, Requeening, oq, vt, migration     | 31521.26477 | 31599.17958 |
| Size, Requeening, oq, vt, migration              | 31529.15928 | 31600.58119 |
| Size, species, Requeening, oq, vt, migration, wf | 31521.58543 | 31605.99313 |
| Size, Requeening, oq, vt, migration, wf          | 31529.51184 | 31607.42665 |
| Size, oq, migration                              | 31571.86079 | 31630.29689 |
| Size, oq, migration, wf                          | 31570.19527 | 31635.12428 |
| Size, species                                    | 31590.24681 | 31635.69711 |
| Size, Requeening, oq, migration                  | 31572.98101 | 31637.91002 |
| Size, migration                                  | 31593.36865 | 31638.81896 |
| Size, species, vt                                | 31590.49875 | 31642.44195 |
| Size, species, wf                                | 31590.81331 | 31642.75651 |
| Size, Requeening, oq, migration, wf              | 31571.74571 | 31643.16762 |
| Size, Requeening, migration                      | 31591.94084 | 31643.88404 |
| Size, migration, wf                              | 31592.11665 | 31644.05985 |
| Size, species, Requeening                        | 31592.24164 | 31644.18484 |
| Size, species, oq                                | 31590.34207 | 31648.77817 |
| Size, species, vt, wf                            | 31591.25877 | 31649.69487 |
| Size, Requeening, migration, wf                  | 31591.78624 | 31650.22235 |
| Size, species, Requeening, vt                    | 31592.47697 | 31650.91308 |
| Size, species, Requeening, wf                    | 31592.72821 | 31651.16431 |
| Size, species, oq, wf                            | 31590.06252 | 31654.99153 |

|                                            |             |             |
|--------------------------------------------|-------------|-------------|
| Size, species, oq, vt                      | 31590.69693 | 31655.62593 |
| Size, vt                                   | 31610.43808 | 31655.88838 |
| Size, species, Requeening, oq              | 31592.33852 | 31657.26752 |
| Size, species, Requeening, vt, wf          | 31593.137   | 31658.06601 |
| species, migration                         | 31620.52716 | 31659.48456 |
| Size, species, oq, vt, wf                  | 31590.60429 | 31662.0262  |
| Size, vt, wf                               | 31611.22469 | 31663.16789 |
| Size, species, Requeening, oq, wf          | 31591.99508 | 31663.41698 |
| Size, species, Requeening, oq, vt          | 31592.68698 | 31664.10889 |
| Size, Requeening, vt                       | 31612.33526 | 31664.27846 |
| Size, oq, vt                               | 31606.72591 | 31665.16201 |
| species, vt, migration                     | 31620.56229 | 31666.01259 |
| species, migration, wf                     | 31620.96893 | 31666.41923 |
| species, Requeening, migration             | 31622.37032 | 31667.82062 |
| vt, migration                              | 31631.47507 | 31670.43247 |
| Size, species, Requeening, oq, vt, wf      | 31592.52063 | 31670.43544 |
| Size, oq, vt, wf                           | 31606.51513 | 31671.44414 |
| Size, Requeening, vt, wf                   | 31613.20783 | 31671.64394 |
| species, oq, migration                     | 31620.56767 | 31672.51087 |
| species, vt, migration, wf                 | 31621.21744 | 31673.16065 |
| Size, Requeening, oq, vt                   | 31608.65946 | 31673.58847 |
| species, Requeening, vt, migration         | 31622.46252 | 31674.40572 |
| species, Requeening, migration, wf         | 31622.94015 | 31674.88336 |
| vt, migration, wf                          | 31632.18142 | 31677.63173 |
| Requeening, vt, migration                  | 31633.0333  | 31678.4836  |
| species, oq, migration, wf                 | 31620.52428 | 31678.96039 |
| species, oq, vt, migration                 | 31620.86555 | 31679.30165 |
| Size, Requeening, oq, vt, wf               | 31608.51114 | 31679.93304 |
| oq, vt, migration                          | 31628.90469 | 31680.8479  |
| species, Requeening, oq, migration         | 31622.50633 | 31680.94243 |
| species, Requeening, vt, migration, wf     | 31623.2071  | 31681.6432  |
| Requeening, vt, migration, wf              | 31633.95787 | 31685.90107 |
| species, oq, vt, migration, wf             | 31621.00354 | 31685.93254 |
| oq, vt, migration, wf                      | 31628.99999 | 31687.43609 |
| species, Requeening, oq, migration, wf     | 31622.52336 | 31687.45237 |
| species, Requeening, oq, vt, migration     | 31622.82292 | 31687.75192 |
| Requeening, oq, vt, migration              | 31630.68736 | 31689.12347 |
| species, Requeening, oq, vt, migration, wf | 31623.00607 | 31694.42798 |
| Requeening, oq, vt, migration, wf          | 31630.91634 | 31695.84535 |
| oq, migration                              | 31675.98811 | 31721.43841 |
| oq, migration, wf                          | 31673.73721 | 31725.68041 |
| Requeening, oq, migration                  | 31675.21127 | 31727.15448 |
| Requeening, oq, migration, wf              | 31673.81493 | 31732.25104 |

|                                 |             |             |
|---------------------------------|-------------|-------------|
| Size, oq                        | 31681.88028 | 31733.82349 |
| Size, oq, wf                    | 31678.04597 | 31736.48207 |
| Requeening, migration           | 31699.86814 | 31738.82554 |
| Size, Requeening, oq            | 31680.45065 | 31738.88676 |
| migration                       | 31706.66235 | 31739.12685 |
| Size, Requeening, oq, wf        | 31677.75163 | 31742.68064 |
| migration, wf                   | 31704.03484 | 31742.99225 |
| Requeening, migration, wf       | 31699.32257 | 31744.77288 |
| Size, Requeening                | 31717.472   | 31762.9223  |
| species                         | 31732.98887 | 31765.45337 |
| Size                            | 31726.55228 | 31765.50969 |
| Size, wf                        | 31722.461   | 31767.9113  |
| Size, Requeening, wf            | 31716.11317 | 31768.05638 |
| species, wf                     | 31732.47182 | 31771.42923 |
| species, vt                     | 31732.71817 | 31771.67557 |
| species, Requeening             | 31733.55365 | 31772.51106 |
| species, oq                     | 31729.89409 | 31775.34439 |
| species, vt, wf                 | 31732.49462 | 31777.94492 |
| species, Requeening, vt         | 31733.47887 | 31778.92918 |
| species, Requeening, wf         | 31733.61333 | 31779.06364 |
| species, oq, wf                 | 31729.02913 | 31780.97234 |
| species, oq, vt                 | 31730.11531 | 31782.05852 |
| species, Requeening, oq         | 31731.13778 | 31783.08098 |
| species, Requeening, vt, wf     | 31733.75165 | 31785.69486 |
| species, oq, vt, wf             | 31729.46979 | 31787.90589 |
| species, Requeening, oq, wf     | 31730.60177 | 31789.03787 |
| species, Requeening, oq, vt     | 31731.42803 | 31789.86414 |
| vt                              | 31758.32668 | 31790.79119 |
| oq, vt                          | 31749.65286 | 31795.10317 |
| species, Requeening, oq, vt, wf | 31731.08113 | 31796.01014 |
| Requeening, vt                  | 31757.52455 | 31796.48195 |
| vt, wf                          | 31758.12768 | 31797.08509 |
| oq, vt, wf                      | 31748.8815  | 31800.8247  |
| Requeening, oq, vt              | 31750.11663 | 31802.05984 |
| Requeening, vt, wf              | 31758.06821 | 31803.51852 |
| Requeening, oq, vt, wf          | 31749.81488 | 31808.25099 |
| Requeening, oq                  | 31831.26205 | 31876.71236 |
| oq                              | 31838.38699 | 31877.3444  |
| oq, wf                          | 31833.27376 | 31878.72407 |
| Requeening, oq, wf              | 31828.20585 | 31880.14905 |
| Requeening                      | 31884.68209 | 31917.1466  |
| Requeening, wf                  | 31882.4847  | 31921.4421  |
| wf                              | 31902.86484 | 31935.32934 |

|      |            |            |
|------|------------|------------|
| none | 31910.4242 | 31936.3958 |
|------|------------|------------|

Size = operation size; Requeening = frequency of requeening; oq = origin of queen; vt = treatment against varroa; qp = queen problems; wf = winter food.

AIC = Akaike Information Criterion

BIC = Bayesian Information Criterion

All of the models include year, province and beekeeper as random effects.
